# Supplementary material for: Validation of Ultrasound Risk Stratification Systems for Cervical Lymph Node Metastasis in Patients with Thyroid Cancer
Source: MDPI journal article supplement (doi:10.3390/cancers14092106), 2022-04-23
Supplement: s1 [file s1]

**Supplementary Table S1.** Frequencies of suspicious US features according to numbers of suspicious US features.

| Number of Suspicious US Features | Number of Suspicious LNs | Hyperechogenicity | Cystic Change | Echogenic foci | Abnormal vascularity |
|----------------------------------|--------------------------|-------------------|---------------|----------------|----------------------|
| 1                                | 28                       | 25 (89.3%)        | 1 (3.6%)      | 2 (7.1%)       | 0 (0.0%)             |
| 2                                | 89                       | 55 (61.8%)        | 13 (14.6%)    | 58 (65.2%)     | 21 (23.6%)           |
| 3                                | 58                       | 46 (79.3%)        | 24 (41.4%)    | 51 (87.9%)     | 43 (74.1%)           |
| 4                                | 22                       | 22 (100.0%)       | 22 (100.0%)   | 22 (100.0%)    | 22 (100.0%)          |

**Supplementary Table S2.** Association of nodal size, shape parameters and primary tumor characteristics with malignant LNs in US suspicious LNs.

| US Features                       | Univariable       |          | Multivariable        |          |
|-----------------------------------|-------------------|----------|----------------------|----------|
|                                   | Crude OR (95% CI) | <i>p</i> | Adjusted OR (95% CI) | <i>p</i> |
| Diffuse thyroid disease           | 1.05 (0.4, 2.5)   | 0.913    | 1.5 (0.6, 4.3)       | 0.353    |
| Maximal diameter of largest tumor | 1.03 (0.9, 1.07)  | 0.237    | 1.03 (0.99, 1.1)     | 0.143    |
| Gross ETE of largest tumor        | 1.97 (0.78, 4.95) | 0.151    |                      |          |
| Multiplicity of tumor             | 0.89 (0.39, 2.03) | 0.792    | 2.79 (0.3, 23.7)     | 0.347    |
| Bilaterality of tumor             | 0.65 (0.28, 1.52) | 0.323    | 0.03 (0.03, 2.3)     | 0.225    |
| Laterality of LN <sup>a</sup>     | 1.02 (0.58, 1.78) | 0.931    | 2.0 (0.7, 5.4)       | 0.171    |
| LD of LN                          | 1.08 (0.98, 1.2)  | 0.09     |                      |          |
| SD of LN                          | 1.34 (1.1, 1.64)  | 0.004    | 1.19 (0.9, 1.4)      | 0.085    |
| L/S ratio of LN                   | 0.30 (0.15, 0.63) | 0.001    | 0.89 (0.2, 3.3)      | 0.87     |
| Round shape (L/S <2.0)            | 3.56 (1.5, 8.5)   | 0.004    | 0.57 (0.1, 2.3)      | 0.432    |
| Round shape (L/S <1.5)            | 5.02 (1.7, 15.1)  | 0.004    | 3.42 (0.9, 13.2)     | 0.075    |

Note-US, ultrasound; OR, odds ratio; ETE, extrathyroidal extension; LN, lymph node; LD, long diameter; SD, short diameter; long-to-short diameter ratio, L/S ratio

<sup>a</sup>Contralateral location of the LN with respect to the primary tumor

**Supplementary Table S3.** Association of nodal size, shape parameters and primary tumor characteristics with malignant LNs in US probably benign LNs.

| US Features                       | Univariable        |          | Multivariable        |          |
|-----------------------------------|--------------------|----------|----------------------|----------|
|                                   | Crude OR (95% CI)  | <i>p</i> | Adjusted OR (95% CI) | <i>p</i> |
| Diffuse thyroid disease           | 2.25 (0.13, 37.5)  | 0.572    |                      |          |
| Maximal diameter of largest tumor | 1.04 (0.9, 1.2)    | 0.526    |                      |          |
| Gross ETE of largest tumor        | 6.80 (0.39, 117.6) | 0.187    | 9.1 (0.4, 203.4)     | 0.165    |
| Multiplicity of tumor             | 2.71 (0.16, 45.4)  | 0.487    | 5.0 (0.2, 126.4)     | 0.328    |
| Bilaterality of tumor             | NA                 | 0.998    |                      |          |
| Laterality of LN <sup>a</sup>     | 0.3 (0.04, 2.8)    | 0.304    | 3.5 (0.17, 72.0)     | 0.417    |
| LD of LN                          | 1.05 (0.9, 1.26)   | 0.539    |                      |          |
| SD of LN                          | 1.13 (0.71, 1.8)   | 0.616    |                      |          |
| L/S ratio of LN                   | 1.14 (0.09, 14.1)  | 0.918    |                      |          |
| Round shape (L/S <2.0)            | 5.627E-9           | 0.998    |                      |          |
| Round shape (L/S <1.5)            | NA                 | 0.998    |                      |          |

Note-US, ultrasound; OR, odds ratio; ETE, extrathyroidal extension; LN, lymph node; LD, long diameter; SD, short diameter; long-to-short diameter ratio, L/S ratio

<sup>a</sup>Contralateral location of the LN with respect to the primary tumor
